# Supplementary figures and images for: Three-dimensional visualization techniques improve surgical Decision Making of robotic-assisted partial nephrectomy
Source: PubMed Central journal article supplement — Heliyon. 2024 Oct 9;10(21):e38806. doi: 10.1016/j.heliyon.2024.e38806 (PMC11550665; doi:10.1016/j.heliyon.2024.e38806), 2024-10-09

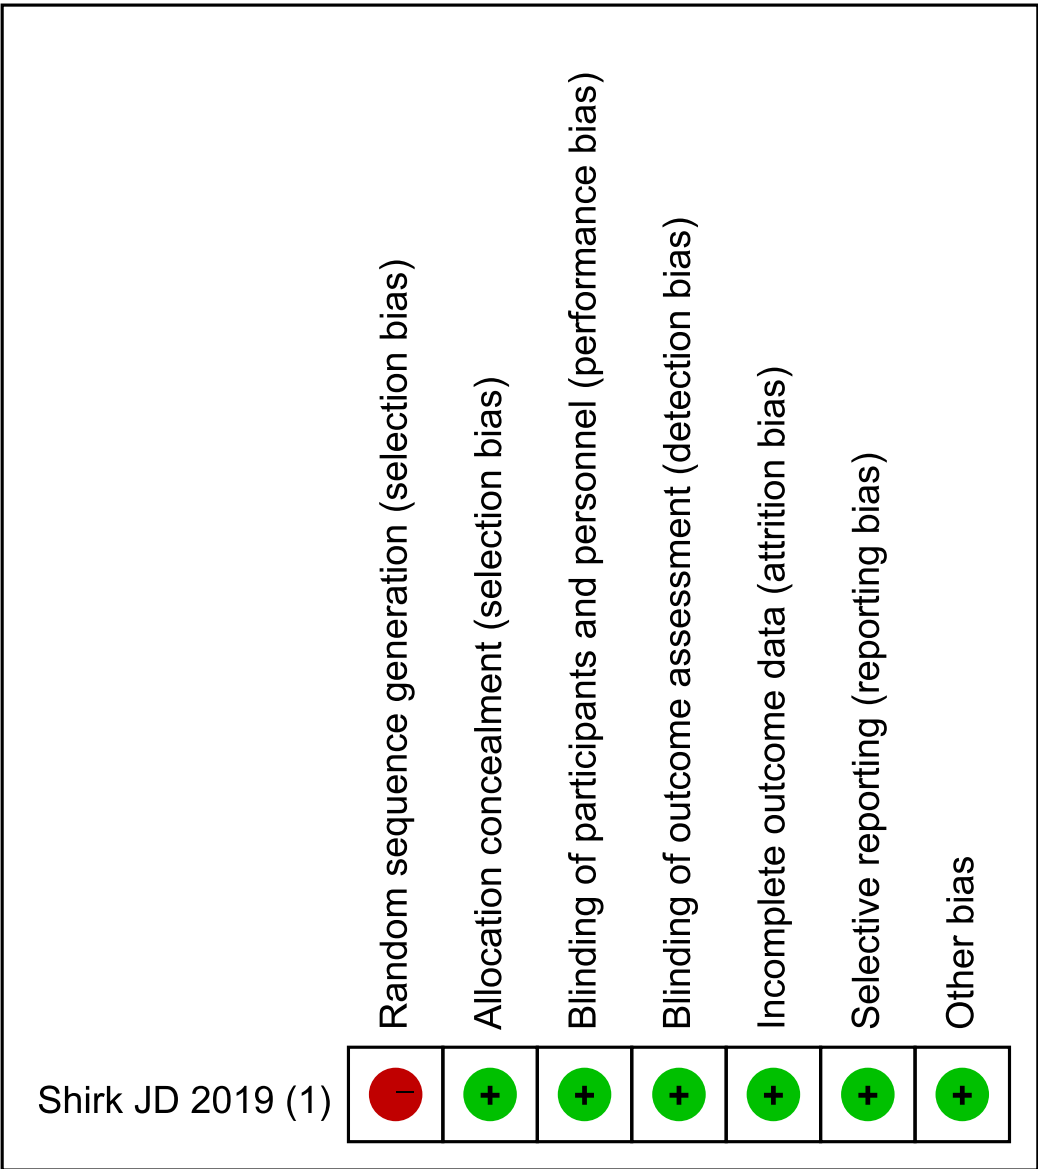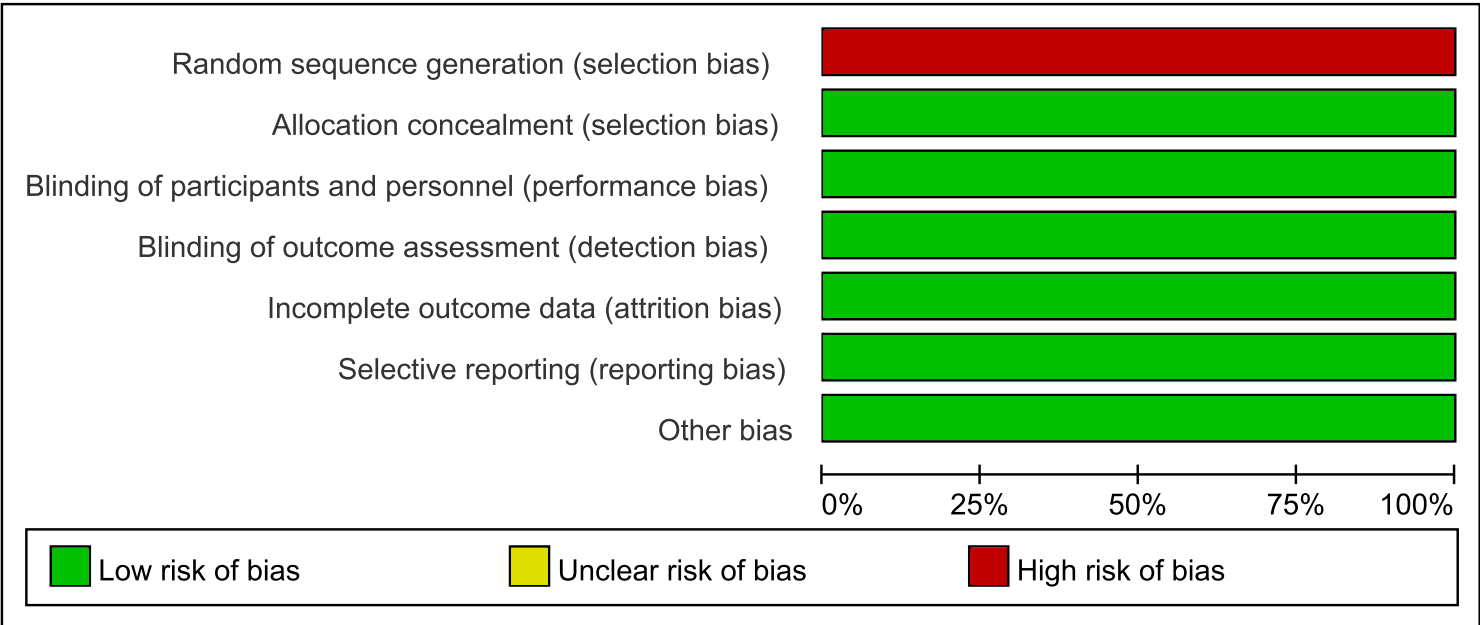

Supplement: mmc4.pdf [file mmc4.pdf]
